# Supplementary material for: Genetically Engineered Extracellular Vesicles Harboring Transmembrane Scaffolds Exhibit Differences in Their Size, Expression Levels of Specific Surface Markers and Cell-Uptake
Source: MDPI journal article supplement (doi:10.3390/pharmaceutics14122564), 2022-11-23
Supplement: s1 [file s1]

**Supplemental Table S1. Number of particles captured and measured in each subtype of EVs**

| <b>Name of Scaffold</b> | <b>Unmodified EVs<br/>(number of particles)</b> | <b>Modified EVs<br/>(number of particles)</b> |
|-------------------------|-------------------------------------------------|-----------------------------------------------|
| <b>CD9-GFP</b>          | <b>31927</b>                                    | <b>22504</b>                                  |
| <b>CD63-GFP</b>         |                                                 | <b>6681</b>                                   |
| <b>CD81-GFP</b>         |                                                 | <b>1825</b>                                   |
| <b>VSVG-GFP</b>         |                                                 | <b>1924</b>                                   |
| <b>Total No.</b>        | <b>31927</b>                                    | <b>32934</b>                                  |

**Supplemental Table S2. Increased sizes of EVs via various engineering scaffolds**

| <b>Name of Scaffold</b> | <b>Unmodified EVs<br/>(% EV &gt; 60 nm)</b> | <b>Modified EVs<br/>(% EV &gt; 60 nm)</b> |
|-------------------------|---------------------------------------------|-------------------------------------------|
| <b>CD9-GFP</b>          | <b>29.7</b>                                 | <b>54.7</b>                               |
| <b>CD63-GFP</b>         |                                             | <b>40.3</b>                               |
| <b>CD81-GFP</b>         |                                             | <b>72.9</b>                               |
| <b>VSVG-GFP</b>         |                                             | <b>52.5</b>                               |
